# Supplementary material for: Long-term Pu-erh tea consumption improves blue light-induced depression-like behaviors
Source: Royal Society of Chemistry journal article supplement (doi:10.1039/d2fo02780a), 2023-01-01
Supplement: d2fo02780a1.pdf [file d2fo02780a1.pdf]

## Supporting Information

### Long-term Pu-erh tea consumption improves blue light-induced depression-like behaviors

Sibo Zhao <sup>a</sup>, Shanshan Hu <sup>a</sup>, Kang Sun <sup>a</sup>, Liyong Luo <sup>a\*</sup>, Liang Zeng <sup>a\*</sup>

a. College of Food Science, Southwest University, Beibei, Chongqing 400715, China

**Fig S1. The effect of Pu-erh tea on body weight and food intake in BLAN mice.**

**Fig S2. Effect of Pu-erh tea on the length of villi in the small intestine.**

**Fig S3. Pu-erh tea reshaped the gut microbes of BLAN mice.**

**Fig S4 The WB results.**

## Supporting Figure 1

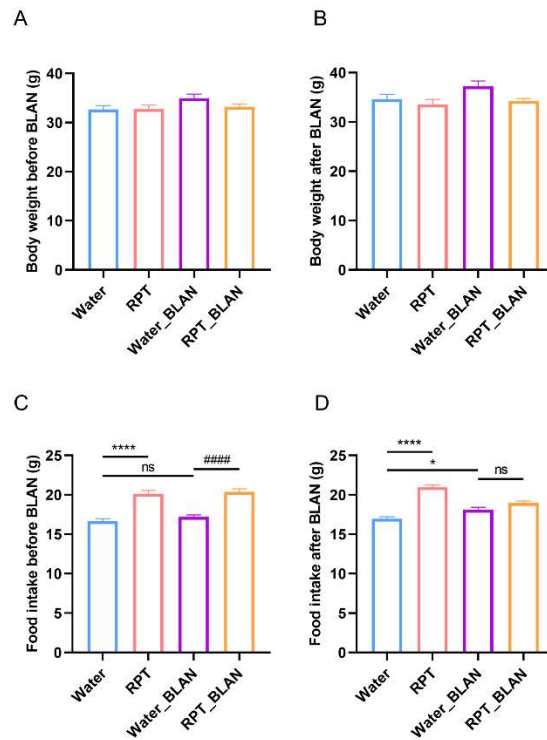

**Figure S1. The effect of Pu-erh tea on body weight and food intake in BLAN mice.**

(A) Body weight before BLAN. (B) Body weight after BLAN. (C) Food intake before BLAN.

(D) Food intake after BLAN. Data presented as mean  $\pm$  SEM. \*  $p < 0.05$ , \*\*  $p < 0.01$ , \*\*\*  $p < 0.001$ ,

\*\*\*\*  $p < 0.0001$  vs the Water group. #  $p < 0.05$ , ##  $p < 0.01$ , ###  $p < 0.001$ , ####  $p < 0.0001$  vs the

RPT\_BLAN group.

## Supporting Figure 2

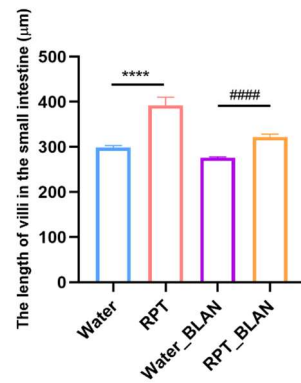

**Figure S2. Effect of Pu-erh tea on the length of villi in the small intestine.**

The villi length of the small intestine was calculated by Image J. Data presented as mean  $\pm$  SEM. \*  $p < 0.05$ , \*\*  $p < 0.01$ , \*\*\*  $p < 0.001$ , \*\*\*\*  $p < 0.0001$  vs the Water group. #  $p < 0.05$ , ##  $p < 0.01$ , ###  $p < 0.001$ , ####  $p < 0.0001$  vs the RPT\_BLAN group.

### Supporting Figure 3

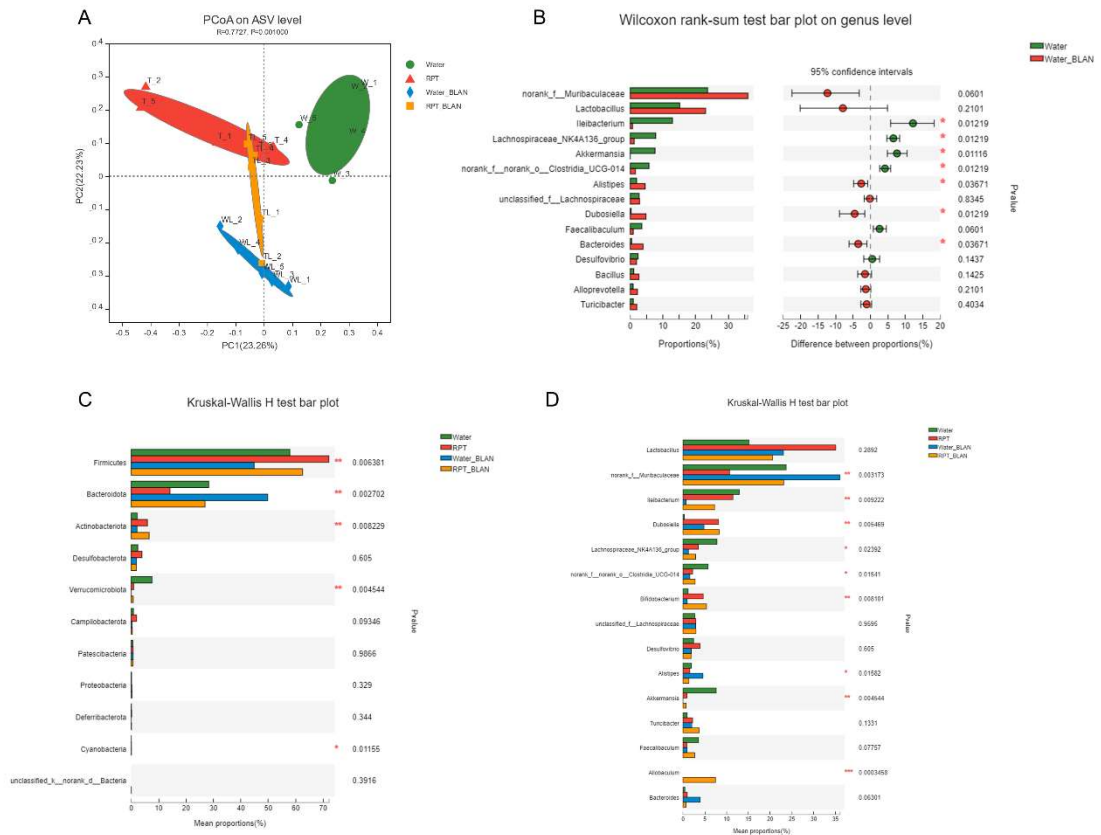

**Figure S3. Pu-erh tea reshaped the gut microbes of BLAN mice.**

(A) The PCoA analysis on ASV level. (B) The Wilcoxon rank-sum test bar plot on genus level between Water mice and Water\_BLAN mice. (C) The Kruskal-Wallis H test bar plot on phylum level. (D) The Kruskal-Wallis H test bar plot in genus level. \*  $0.01 < p \leq 0.05$ , \*\*  $0.001 < p \leq 0.01$ , \*\*\*  $p \leq 0.001$ .

### Supporting Figure 4

WB1:

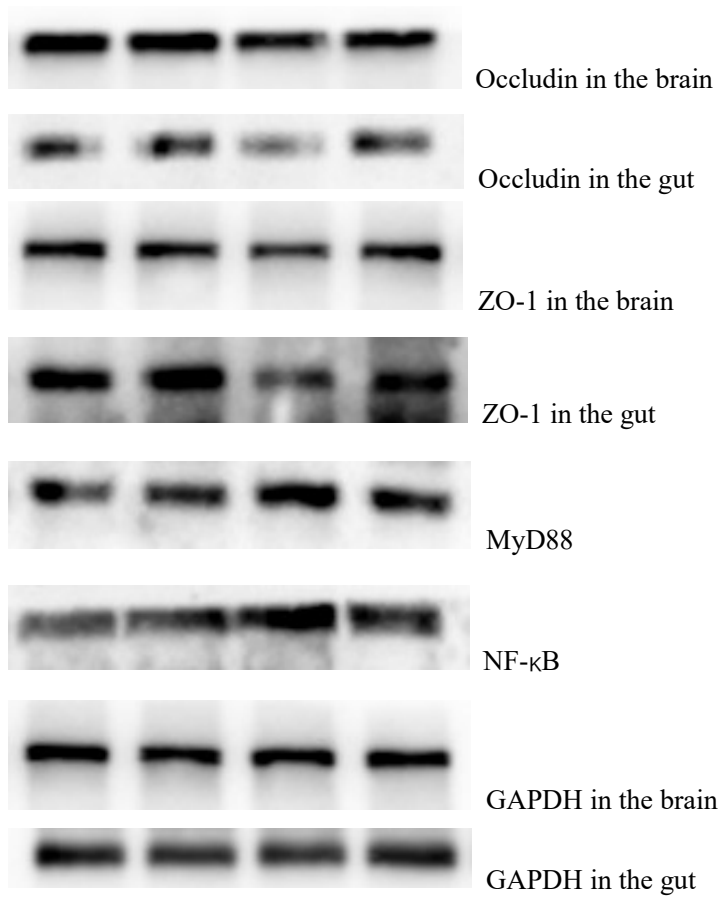

WB2:

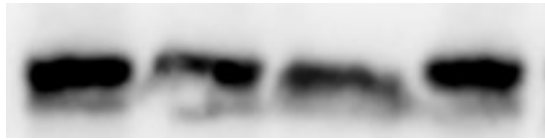

Occludin in the brain

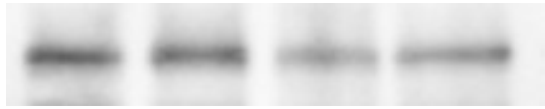

Occludin in the gut

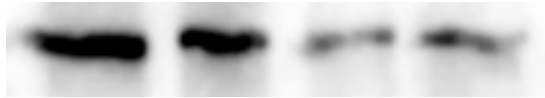

ZO-1 in the brain

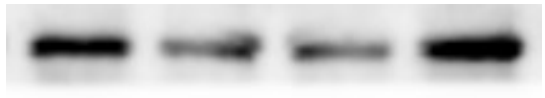

ZO-1 in the gut

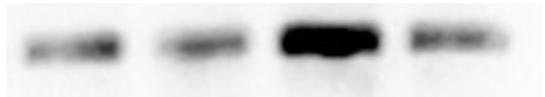

MyD88

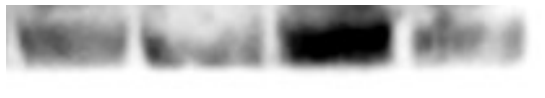

NF- $\kappa$ B

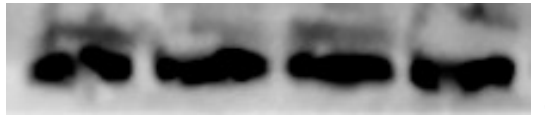

GAPDH in the brain

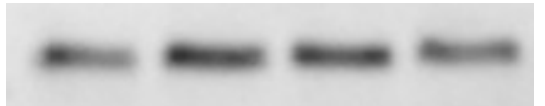

GAPDH in the gut

WB3:

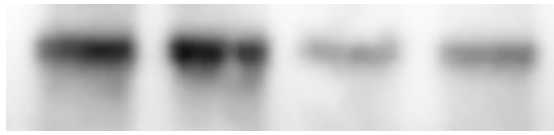

Occludin in the brain

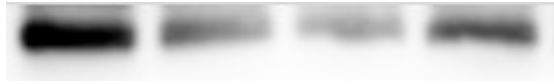

Occludin in the gut

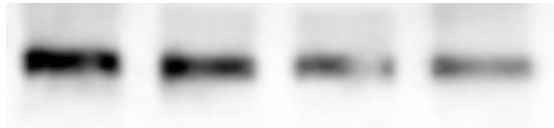

ZO-1 in the brain

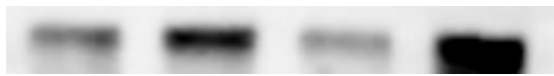

ZO-1 in the gut

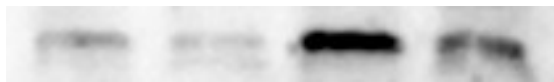

MyD88

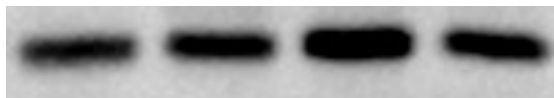

NF-κB

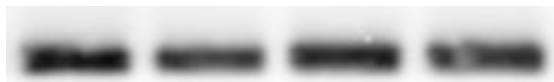

GAPDH in the brain

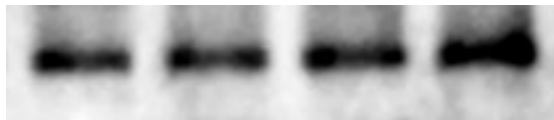

GAPDH in the gut
